# Supplementary material
Source: MDPI journal article supplement (https://www.mdpi.com/1999-4907/12/5/595)
Supplement: s1 [file s1]

**Table S1.** Statistical analysis of adventitious root development and plant height between *WT* and transgenic *Populus* (45 days).

| <b>Name</b>               | <b>Number of adventitious roots</b> | <b>Maximal length of adventitious roots</b> | <b>Plant height</b> |
|---------------------------|-------------------------------------|---------------------------------------------|---------------------|
| Wild type <i>Populus</i>  | 4.60 ± 0.55                         | 5.84 ± 0.71                                 | 6.00 ± 0.34         |
| Transgenic <i>Populus</i> | 4.40 ± 1.14                         | 5.28 ± 0.97                                 | 6.06 ± 0.27         |
