# Supplementary material
Source: MDPI journal article supplement (https://www.mdpi.com/1999-4907/12/5/595)
Supplement: s1 [file s1]

Archive with 5 entries (5 files):
- FigureS1.tif
- FigureS2.tif
- supplementary data 1-Full-length GbHMGS1 and GbHMGS2 (1).pdf
- supplementary data 2-Two hundred seventy metabolites.xlsx
- Table S1.pdf
