# Supplementary material
Source: MDPI journal article supplement (https://www.mdpi.com/1999-4907/12/5/595)
Supplement: s1 [file s1]

Full-length of *GbHMGS1* gene

cttagctcccagcacgtgggcagcgtctatttaacaagacattgattcttcatcaaagcacagacaagttgttctccatattcgaggg  
tttgctataagctgccagcccctgtgcttctcctaaagaacagatttggctggttgtgcagaaaATGGCGTCTCATCCAG  
AAAATGTTGGTATTTTGGCTATGGATATCTACTTCCGAGCACATGTGTTTCAGCAG  
GATGCCCTGGAAACCTTTGATGGAGTAAGTAAAGGGAAATACACAATTGGCCTT  
GGACAAGACTGCATGGCATTTCATGGACTTGGAAGATGTGATTTCCATGAGCT  
TGACTGTAGTATCCTCACTCTTGACAAAGTATGGAATCGATCCAAAAAGAATTGG  
TCGCTTGGAAGTTGGCAGTGAACTGTTATTGACAAGAGCAAGTCCATAAAGACC  
TGTTGATGCAGATTTTTGAGGAATGTGGCAATAGTGAGATTGAAGGTGTGGACT  
CAACAAATGCATGCTATGGAGGAAGTGCAGCTCTGCTTAACTGTGTAACTGGGT  
TGAAAGCAGGTCTTGGGATGGGCGATATGGTCTCGTTGTTTCTACAGACAGTGCA  
GTCTATGCTGAAGGTCCAGCCCGACCTACAGGGGGAGCAGCTGCTGTTGCTATGC  
TGATAGGGCCCAATGCACCTATAGTGTGTTGAAAGCAAATACAGGGGAACACACA  
TGTCTCATGCGTATGACTTTTATAAGCCCAATTTAGCCAGCGAGTACCCAGTTGTG  
GATGGGAAGCTTTCACAACTTGCTATCTCATGGGACTGGACTCATGCTACAAAC  
GGTTTTGTAATCGGTTTGAGGAGGGAGAAGGAAGACAATTTTCTCTTTCAGATGC  
AGATTATGTAGCATTTCACTCTCCATACAATAAGCTTGTGCAAAAGAGCTTTGCT  
CGACTGTTGTTCAATGATTTCTCAAGACATGCCAGTTCTGTTGGGAAGGATGCGC  
AAGAAAAGCTAGAGCCGTATGCAGGCTTGTCTGATGAAGATAGCTACAGTAGCC  
GTGAACTAGAAAAGGTTTCTCAGCAGGTTGCTAGGCCATTGTATGATGTAAAAGT  
TCAACCATCAACCTTATTGCCAAAGCAAGTAGGCAACATGTACACAGCATCTCTT  
TATGCAGCGTTTGCCTCTATTATACATAACAAGCATGATACCCTGGAGGGGCAGA  
GGGTGTTGATGTTTTCTTATGGGAGTGGTTTGGCTTCCACAATGTTTTCTTTGAAA  
ATTCGGGAGGGTCAGCATCCTTTCACCTTAACAAATATTGCAGATGTTATGGATG  
TCTCGAGCAAGCTTGATTCTCGACATGTGTTGTCCCCTGAAGATTTTATGGTCAAC  
ATGAAGCTGATGGAGACTCTATATGGAGCAAAAGATTTTCAATTCATGCTCTGATC  
ACAACCTTGCTGCGATCTGGAACATTTTATTTGACTCAAGTAGATTCAATGTACCG  
ACGTTTCTATGCCCAGAAGGTTGCAAGTCCAGATGACACTCATGAGAAGGTCAAA  
CTTGCAAATGGTATCATCCATGATCAATTGTAACacatgtagattgagagattgagtagatcacatcta  
catatcatgtgcaggagaggtgaatgtaagttctgcattgtaacatagcattcttgagcctccccctcatcttttgtagctcttttcttca  
tttaagtggcatgatggcattgagagaataaattgggagaatgctattcaggaattattgctcagtatgcattggcctcctgttctttgtc  
aattgtggaataaacattggcaaaggaactcttgcctttttactgcattccgaaatctatccatctgctgatgtttggagaggatttaaggaa  
gcatttcttcagaaatgaactagatttatgggtctttgtatctaaattaaatccttggttctgtttgcacagaaactcatgactatttgat  
ctgtgattattgttttgaatgacaaaaatgttttgtagaaaacaactacaatcagtttccagaggggagaactgtatcatccgattga  
gagttgatctgtaagatatattgtatgcatttacatcttgacttggatattcaattggaattggatttggccttgaaaaaaaaaaaaaaaa  
aaaaaaaa

Full-length of *GbHMGS2* gene

aattcggactgaaccggtactctgtgctgcagtcgagagagtttctgatttcagctgcacttgctggttggttgagttgggcaaatttgtcc  
caaaccccccaaaaaaacaagaaATGGAGAGTGGGCGACCAGAAAATGTTGGAATTTTGGG  
TATGGAATCTATTTTCCGAGGACATGCGTGAAACAGGAGGCGCTGGAAGCATA  
CGATGAAGTGAGCAAGGGAAAATACACGATTGGGCTTGGGCAAGAGTGTATGAG  
TTTCTGCACGGACTTGGAAGATGTGATATCCATGAGCTTGACTGCAGTGAGCTCC  
CTTTTGGAGAAGTATGGCGTTGATCCGAAAGAAATTGGGCGACTGGAGGTGGGA  
AGCGAAACAGTGATAGACAAGAGCAAGTCTATAAAGACGTGGCTGATGCAGATT  
TTTGACGAGTGTGGGAACTCGGATATTGAAGGCGTGGACTCCACAAACGCGTGCT  
ATGGAGGAACTGCAGCTCTGTTTAACTGTGTGAATTGGGTGGAAAGCAGTTGCTG  
GGACGGACGATATGGTCTGGTCGTCTCCACAGACAGTGCAGTGTATGCGGAAGG  
GTCAGCTCGTCCTACAGGAGGAGCAGGTGCTGTGGCAATGCTGATAGGCCCCAA  
CGCACCCATTGCATTTGAAAGCAAATTGAGGGGAAGTCACATGGCTCACGCCTAC  
GACTTCTATAAACCTCATTTGTCCACCGAGTATCCAGTCGTGGACGGAATGCTTTC  
ACAGAAATGTTATCTCATGGCGTTGGACGCATGCTACAAAAGATTTTGCAACAAG  
GCCGTTTCACAGTTTTTGTCTTGCGGATGCCGACTACGTCGTCTTTCATTACCCTA  
CAACAAGCTCGTACAAAAGAGCTTCGCTCGGTTGCTGTTTGATGATTTCAAGGCA  
GTCGCCCCTTGTGTTGGAAAGGATGCACGCGAAAAACTGGAGCCCTTTGCAGCCT  
TGTCCGATGAGGAGAGCTATAGCAGCCGAGAACTTGAAAAGGCTTGCCAGCACC  
TCGCCAGGCCACTCTACGATGAAAAGGTGGTTCCCGCAACCTTGTTGCCCAAGCA  
GGTTGGCAACATGTACACAGCCTCTCTCTATGCAGCATTAGCCTCTCTTATACATA  
ACAAGCGCGATTCACTTGTGGACGGCCAAAGGGTTTTGATGTTCTCTTATGGAAG  
CGGCCTCACTTCCACAATGTTTTCTCTTCGAATTCGTAATGCTCCCGCCATCCTT  
TCACATTATCCAACATCGCAAATGTAATGGATGTCTCTGCCAAGCTTCTTCCAGG  
AATGTCTTCTCCCCCTCAAGATTTTGCTGTCAACATGAAGCTCATGGAGAGTCGGT  
ATGGAGCAAAACAGTTTGTTCGTCCTCCCACCAGTCGCTTCTGCGCCCTGGAAC  
TTTTTATTTGACCCATGTAGACTCCAAGTATAGACGTTTCTATGCCAGGAAGCCAT  
CAGGCCACACTTCTCTCAAATGCCCAATGGTCACGTCCACGACGATCATAACCGT  
TTAAattctctcctctatactctaattacatgttaaaagacataaaaagtcgtggtgaactgttattattgtaaaagggtgggcctgctata  
atctaaaaatttcccatatgtggtcataaagtccaaaaaaaaaaaaaaaaaaaaaaaaaaaa
