# Supplementary material
Source: MDPI journal article supplement (https://www.mdpi.com/1999-4907/12/5/595)
Supplement: s1 [file s1 › supplementary data 2-Two hundred seventy metabolites.xlsx]

## Sheet: 数据矩阵
Alignment ID	Average Rt(min)	Quant mass	Metabolite name	Total similarity	WT-1	WT-2	WT-3	HMGS-1	HMGS-2	HMGS-3	QC-0	QC-1	QC-2	QC-3
301	18.36	342	1,2,4-Benzenetriol	847.034	0.0157	0.0136	0.0121	0.021	0.0184	0.022	0.0195027	0.0189125	0.0142889	0.0136529
62	7.63	258	1,2-Dihydroxycylohexane	770.916	1.0775	0.9121	0.6451	1.0043	0.856	0.9663	0.841115	0.837569	0.841293	0.833028
157	11.4	240	1,3-Dihydroxypyridine	777.349	0.0489	0.0023	0.0414	0.0016	0.0217	0.0548	0.025855	0.0258901	0.0252694	0.0252363
414	23.24	133	1,5-Anhydroglucitol	840.455	0.092	0.0657	0.0781	0.0824	0.0645	0.0791	0.0566871	0.0416006	0.0445083	0.0735232
686	40.39	132	1-Kestose	880.505	1.5434	0.0145	0.0125	0.0205	1.0101	1.4747	1.16421	1.176	1.13899	1.13059
806	45.81	259	1-Methyladenosine	705.68	0.545	0.2747	0.088	0.3042	0.2102	0.3643	0.279235	0.299394	0.272906	0.228495
64	7.77	171	1-Methylhydantoin	691.808	0.0004	0.0004	0.0004	0.0007	0.0007	0.0006	0.000435336	0.000499991	0.000477474	0.000449385
354	20.65	158	2,3-Dihydro-8-Methoxyfuro(2,3-B)Quinoline	687.134	0.002	0.0351	0.0169	0.0035	0.0004	0.0018	0.000922153	0.0011242	0.00122235	0.00102784
169	11.97	117	2,3-Dihydroxybutanoic Acid	810.186	0.0075	0.0001	0.002	0.0029	0.0051	0.0078	0.004031	0.00568291	0.00488606	0.00493055
550	31.51	204	2,4,7-Trihydroxypteridine	677.224	0.0667	0.0646	0.0386	2.8692	1.923	0.0778	0.0476663	0.0465863	0.0442352	0.224029
216	14.12	117	2-Deoxytetronic Acid	723.998	0.1115	0.0007	0.0091	0.0116	0.0131	0.037	0.032521	0.033125	0.0338159	0.0333038
84	8.43	146	2-Hydroxy-2-Methylbutanoic Acid	725.773	0.0008	0.0009	0.0006	0.0006	0.0004	0.0006	0.000536226	0.000666733	0.000605739	0.000641473
289	17.78	129	2-Hydroxyglutaric Acid	788.076	2.8573	0.0301	0.0095	0.0206	0.0155	0.0341	0.023926	0.0238978	0.0245308	0.0248
122	9.76	221	2-Hydroxyhexanoic Acid	819.902	0.0004	0.0005	0.0004	0.0006	0.0007	0.0005	0.000512581	0.000469132	0.000379495	0.000521895
108	9.35	392	2-Hydroxypentanoic Acid	692.653	0	0.0004	0.0009	0.0004	0.0004	0.0131	0.000292418	0.000286291	0.000312141	0.000367894
18	5.7	121	2-Hydroxypyrazinyl-2-Propenoic Acid	708.351	0.0196	0.0197	0.0188	0.0213	0.0205	0.0214	0.019679	0.0178849	0.0187845	0.0181338
106	9.28	131	2-Hydroxyvaleric Acid	870.914	0.0271	0.0258	0.0006	0.002	0.001	0.0007	0.000845021	0.000979514	0.000783844	0.000743387
286	17.65	275	2-Isopropylmalic Acid	658.696	0.0028	0.0009	0.0008	0.0016	0.0018	0.0085	0.00250649	0.00249594	0.00249143	0.00247207
93	8.87	89	2-Ketobutyric Acid	763.342	0.0054	0.0091	0.0027	0.0029	0.0018	0.004	0.00384946	0.00387777	0.00388992	0.00374638
118	9.71	147	2-Ketoglucose Dimethylacetal	861.882	0.0233	0.0201	0.0119	0.0122	0.0135	0.0294	0.0164808	0.016941	0.0162436	0.0168089
104	9.24	89	2-Ketoisocaproic Acid	727.92	0.0025	0.0033	0.05	0.0572	0.0591	0.0017	0.00170748	0.00174385	0.00167275	0.00155388
16	5.66	89	2-Ketoisovaleric Acid	739.737	0.0227	0.0273	0.0085	0.0191	0.0249	0.0404	0.0206257	0.0207662	0.0221643	0.0213402
196	13.25	172	2-Methylglutaric Acid	746.586	0.0014	0	0.0008	0.002	0.0026	0.006	0.00210612	0.00212762	0.00232806	0.00218606
654	38.54	267	2-Monoolein	793.467	0.0223	0.022	75.0733	1.6191	112.982	1.3279	1.02908	1.12079	1.14856	1.18527
32	6.13	136	2-Picolinic Acid	710.035	0.0019	0.0022	0.0013	0.002	0.0022	0.0025	0.00156407	0.00155055	0.0016245	0.00160441
285	17.61	245	2-Piperidinobenzonitrile	693.643	0.0009	0.0016	0.0379	0.0012	0.0013	0.0024	0.00130103	0.00176294	0.00120269	0.00138301
856	48.25	193	3,4-Dihydroxybenzoic Acid	602.831	0.0853	0.0681	1.6932	0.0863	0.0564	6.7165	0.056723	0.0684745	0.0593927	0.0478123
549	31.51	219	3,4-Dihydroxycinnamic Acid	876.264	0.4919	0.4446	0.3001	0.5915	0.5111	0.6163	0.811259	0.574143	0.390576	0.395397
144	10.84	231	3,6-Anhydro-D-Galactose	830.436	0.008	0.0078	0.0087	0.0141	0.0125	0.0151	0.0129906	0.0128643	0.00914362	0.00841807
136	10.37	174	3-Aminoisobutyric Acid	947.781	0.569	0.5825	0.5104	0.4725	0.4815	0.5317	0.516474	0.515156	0.508475	0.508863
421	23.49	296	3-Dehydroshikimic Acid	705.563	0.0067	0.0036	0.0138	0.0366	0.0722	0.0042	0.00214716	0.00215738	0.00230009	0.00275536
437	24.23	231	3-Deoxyhexitol	849.581	0.3421	0.0672	0.0453	1.0559	0.0642	0.065	0.0708795	0.0713004	0.0798319	0.096617
557	32.2	297	3-Hydroxy-3-(4'-Hydroxy-3'-Methoxyphenyl)Propionic Acid	745.267	0.0116	0.0069	0.026	0.0068	0	0.0211	0.00332723	0.003225	0.00297536	0.00284331
304	18.42	147	3-Hydroxy-3-Methylglutaric Acid	894.041	0.0677	0.0487	0.037	0.0841	0.0422	0.0607	0.0471127	0.0465103	0.0465502	0.0479439
283	17.52	267	3-Hydroxybenzoic Acid	854.124	0.0039	0.0044	0.0038	0.0049	0.004	0.005	0.00358509	0.00393457	0.00358764	0.00432647
73	8.12	177	3-Hydroxypropionic Acid	661.542	0.0017	0.0013	0.0009	0.0007	0.0007	0.001	0.00102814	0.00113624	0.000994061	0.000953537
293	17.89	193	3-Phenyllactic Acid	809.104	0.0652	0.0519	0.0291	0.0265	0.0243	0.0412	0.0339628	0.0377874	0.0369597	0.0387255
428	23.72	299	3-Phosphoglycerate	903.946	0.0273	0.0308	0.0114	0.0519	0.0342	0.1104	0.0201665	0.0229735	0.036504	0.0423937
33	6.15	102	3-Ureidopropionate	665.415	0.0013	0.0011	0.0011	0.001	0.0006	0.0446	0.000557829	0.000590445	0.000826995	0.000903334
753	43.72	361	4',5-Dihydroxy-7-Glucosyloxyflavanone	827.075	2.8463	2.5666	0.5702	0.5343	0.8518	1.5433	1.26415	1.31833	1.29587	1.31403
262	16.55	174	4-Aminobutyric Acid	930.93	0.941	1.6064	0.5892	2.9434	1.5548	2.6657	1.5894	1.59518	1.57939	1.56711
42	6.52	113	4-Aminophenol	637.333	0.001	0.0009	0.0007	0.0011	0.0011	0.0009	0.000914707	0.000889309	0.000860638	0.000863514
490	26.93	219	4-Hydroxycinnamic Acid	876.241	0.7249	0.2396	0.332	0.589	0.1317	0.1254	0.56679	0.335593	0.361941	0.372325
820	46.34	193	4-Hydroxyhippuric Acid	562.632	0.0774	0.1047	0.0532	0.1117	0.1237	0.1779	0.0866336	0.0854301	0.0815938	0.0858131
252	16.03	267	4-Hydroxymandelic Acid	805.453	0.0061	0.0001	0.0052	0.0064	0.0056	0.0089	0.00170184	0.00396591	0.005992	0.00695503
319	19.06	204	4-Hydroxyproline	800.098	0.6117	0.6054	0.0059	0.009	0.0092	0.0111	0.00420421	0.00640824	0.00944059	0.0102887
471	25.89	228	4-Methylbenzenesulfonamide	808.243	4.4948	0.0538	0.1052	2.9582	2.4287	0.0512	0.041672	0.03459	0.0362277	0.0715772
217	14.13	147	4-Methylcatechol	800.967	0.052	0.0005	0.023	0.0255	0.0497	0.0585	0.0365541	0.0378798	0.0375112	0.0367817
219	14.28	243	5,6-Dihydrouracil	778.386	0.0108	0.0002	0.012	0.0183	0.0147	0.0182	0.0134868	0.0147088	0.0122149	0.0126788
204	13.57	174	5-Aminovaleric Acid	880.956	0.0139	0.0002	0.0109	0.0151	0.0131	0.0118	0.0125355	0.012708	0.0131771	0.0124718
276	17.09	232	5-Hydroxynorvaline	888.515	0.0167	0.0166	0.0015	0.0934	0.0852	0.0251	0.0472172	0.0458917	0.0433004	0.0433034
215	14.04	174	5-Methoxytryptamine	915.328	0.4833	0.0071	0.3937	0.4898	0.4504	0.3974	0.436248	0.44274	0.44044	0.43657
373	21.34	117	6-Deoxyglucose	926.328	5.1852	0.0538	1.5258	0.0346	0.0384	0.0462	0.0444035	0.043264	0.0442533	0.0430472
402	22.7	294	7-Methylguanine	650.683	0.027	0.0166	0.0146	0.0452	0.0222	0.0352	0.020318	0.0199024	0.0223285	0.0270098
392	22.31	229	Aconitic Acid	918.329	0.0823	0.0199	0.0329	0.0749	0.0127	0.0266	0.0367397	0.0334117	0.0371109	0.0426738
58	7.38	116	Alanine	959.502	0.2663	0.3972	0.2945	0.5428	0.5367	0.8277	0.368632	0.373526	0.388482	0.385178
388	22.12	85	Alkane	803.226	0.033	0.0206	0.0188	0.0244	0.0231	0.0332	0.0205782	0.020916	0.0261684	0.0325477
756	43.92	296	Alloxanoic Acid	682.551	0.1936	0.2582	0.1504	0.2861	0.2775	0.4047	0.21811	0.224962	0.233336	0.23758
320	19.07	221	Alpha Tocopherol	693.116	0.007	0.0058	0.0027	0.0025	0.003	0.0048	0.00501176	0.00493234	0.00486066	0.00490805
290	17.8	147	Alpha-Ketoglutarate	935.519	0.4449	0.2584	0.0573	0.1223	0.0833	0.2435	0.179414	0.185436	0.194992	0.194768
813	46.16	212	Alpha-Tocopherol	523.432	0.0086	0.0396	0.6171	0.4048	0.582	0.0249	0.0260223	0.026309	0.015059	1.29259
375	21.46	117	Arabitol	937.951	0.129	0.0949	0.0245	0.0294	0.0363	0.111	0.0755497	0.0761629	0.0762061	0.0663161
695	40.97	284	Arbutin	657.12	0.1924	0.0023	0.0012	0.0017	0.1036	0.1479	0.117946	0.114678	0.113047	0.110387
292	17.86	117	Ascorbic Acid	866.81	0.017	0.0198	0.0172	0.0325	0.0322	0.0327	0.0227844	0.0228401	0.0227152	0.0222164
346	20.18	116	Asparagine	943.493	0.0187	0.0041	0.0028	0.4754	0.4463	0.0044	0.0705616	0.0793333	0.0841543	0.101098
213	13.95	160	Aspartate	941.059	0.1191	0.0019	0.12	0.0364	0.0591	0.4614	0.0620245	0.0861266	0.0883942	0.088225
258	16.33	232	Aspartic Acid	901.924	0.3128	0.0095	0.2033	0.5757	0.3868	0.1371	0.459391	0.463238	0.449487	0.457617
129	10.09	147	Benzoic Acid	893.852	0.014	1.0899	0.0084	0.2843	0.6427	0.0039	0.30424	0.30942	0.297894	0.294392
8	5.4	102	Benzylalcohol	796.154	0.0075	0.0063	0.0076	0.0104	0.0086	0.0108	0.00773904	0.00823548	0.00768129	0.00668331
214	13.99	248	Beta-Alanine	760.059	0.002	0.0001	0.0021	0.0024	0.0017	0.0038	0.00239946	0.00236469	0.00229907	0.00221974
222	14.49	117	Beta-Glutamic Acid	791.111	0.0108	0.0001	0.0012	0.0128	0.0115	0.0008	0.00940623	0.00948861	0.00930716	0.00897737
83	8.4	152	Beta-Hydroxymyristic Acid	734.72	0.0051	0.0059	0.0415	0.005	0.0046	0.0093	0.00552164	0.00564612	0.0061106	0.00603369
574	33.5	204	Beta-Mannosylglycerate	916.996	0.1498	0.2336	0.0484	0.1968	0.1337	0.2479	0.0896951	0.101116	0.0855204	0.0793291
56	7.32	154	Biphenyl	745.918	0.0037	0.0045	0.0028	0.007	0.0068	0.005	0.00608646	0.00580705	0.00496015	0.00370147
76	8.21	142	Butyrolactam	800.198	0.0032	0.004	0.0012	0.0072	0.0039	0.007	0.00287204	0.00278009	0.00314161	0.00277816
181	12.45	174	Caffeine	673.087	0.0007	0	0.0005	0.0323	0.0047	0.0029	0.000737041	0.000571103	0.00068487	0.000547802
228	14.81	117	Capric Acid	845.554	0.004	0.0001	0.0032	0.0036	0.028	0.0041	0.00358242	0.0031463	0.00323587	0.00350743
2	5.22	117	Carinitine	691.703	0.0071	0.0082	0.0086	0.0085	0.0085	0.0075	0.00710906	0.0066349	0.006409	0.00678882
159	11.43	254	Catechol	915.177	0.6409	0.1615	0.2559	0.0802	0.3022	0.7387	0.355091	0.352533	0.347741	0.346188
417	23.34	392	Cerotinic Acid	579.963	3.492	1.825	0.0284	0.0421	0.0715	0.0992	0.0623676	0.0277702	0.0315611	0.0832006
395	22.46	143	Chenodeoxycholic Acid	634.546	0.0215	0.5838	0.1057	0.5678	0.6359	0.0326	0.0118894	0.0113017	0.0131865	0.0173203
810	45.98	345	Chlorogenic Acid	837.981	1.2386	2.3917	0.2208	0.4219	0.434	1.9782	0.840833	0.932238	0.948468	0.795939
279	17.21	108	Cholesterol	609.952	0.0313	0.0182	0.0076	0.0033	0.0036	0.0066	0.013421	0.0133631	0.0127887	0.0127295
459	25.28	132	Cis-Gondoic Acid	655.949	11.9208	0.1369	8.4852	0.1417	0.1103	0.1125	0.0765108	0.088901	0.0911885	0.133112
781	44.91	338	Cis-Sinapinic Acid	550.649	0.0309	0.0201	0.0084	0.0165	0.015	0.0276	0.0129466	0.0175083	0.0194318	0.01649
172	12.16	147	Citraconic Acid	916.689	0.1191	0.0025	0.0134	0.0356	0.0237	0.0285	0.0447973	0.0325449	0.0153482	0.0114874
233	15.03	247	Citramalic Acid	842.652	0.0093	0.0001	0.0032	0.0031	0.0043	0.0058	0.00516498	0.00516748	0.00503795	0.00502162
433	24.02	273	Citric Acid	954.597	33.4414	6.4388	15.6525	23.0131	4.1205	6.8037	11.2747	11.388	13.0098	15.6255
435	24.17	157	Citrulline	936.178	0.0169	0.017	0.004	2.5976	0.329	0.0072	0.152976	0.169103	0.187735	0.213572
534	30.39	305	Conduritol-Beta-Expoxide	889.6	54.4218	26.0124	104.498	97.7389	25.0765	44.0525	42.5722	43.0436	42.597	42.2088
637	37.39	325	Coniferin	626.73	0.0002	0.0003	0.0002	0.0316	0.0174	0.0357	0.0339429	0.0282181	0.0231935	0.023117
185	12.68	141	Cyanoalanine	892.108	0.0023	0	0.0015	0.0099	0.0092	0.0011	0.00422077	0.00423192	0.00371307	0.00333359
278	17.19	174	Cysteine	822.099	0.0039	0.0033	0.0026	0.0036	0.0048	0.0048	0.00344312	0.00371856	0.00373187	0.00354485
231	14.95	257	Cysteine-Glycine	741.204	0.004	0.0001	0.002	0.0069	0.0025	0.0069	0.00221531	0.00545464	0.0020993	0.00194375
260	16.42	254	Cytosin	811.255	0.0013	0.0004	0.0236	0.0035	0.002	0.0034	0.00214247	0.00201022	0.00208671	0.00185885
623	36.87	124	D6 Cholesterol	586.673	0.0004	0.0005	0.2487	0.0118	0.0439	0.0191	0.0176862	0.0206449	0.0189545	0.0193544
688	40.51	239	Dehydroabietic Acid	628.388	0.0993	0.0459	0.067	0.1931	0.1667	0.1642	0.103716	0.104302	0.106701	0.10567
442	24.57	173	Dehydroascorbic Acid	940.538	0.2455	0.1754	0.1407	0.1487	0.1313	0.2173	0.133713	0.132769	0.15106	0.18037
496	27.28	204	D-Erythro-Sphingosine	800.445	0.3583	0.5078	1.6207	0.5152	0.2059	0.1958	0.376065	0.367713	0.380281	0.382591
610	36.15	217	Digalacturonic Acid	861.81	0.0161	0.0082	0.1155	0.4218	0.4107	0.443	0.382127	0.436308	0.402799	0.426748
206	13.61	103	Diglycerol	812.295	0.057	0.0005	0.0103	0.0152	0.0145	0.0348	0.0247272	0.025355	0.0253407	0.0251983
308	18.61	221	Dihydroxymalonic Acid	766.466	0.0011	0.0318	0.0008	0.0614	0.0475	0.0011	0.00115663	0.000904428	0.000826112	0.000924279
401	22.65	349	Dimethyluric Acid	607.817	0.0108	0.0059	0.0018	0.0023	0.0038	0.0058	0.00312769	0.00323859	0.00330501	0.00379329
207	13.65	97	Dodecanoic Acid, Isopropanol Ester	666.956	0.001	0	0.001	0.0013	0.0006	0.0008	0.000611625	0.000757888	0.00097896	0.00137591
52	7.11	147	Enolpyruvate	936.949	0.0278	0.0241	0.0196	0.0351	0.0293	0.0434	0.0269891	0.0298394	0.0278074	0.0273459
384	21.87	355	Epicatechin	731.388	0.127	0.1174	0.0534	0.0826	0.0879	0.1147	0.0635831	0.0689858	0.0803329	0.103461
111	9.44	170	Epsilon-Caprolactam	805.365	0.0011	0.0015	0.0009	0.0027	0.0021	0.0032	0.00210473	0.00202244	0.0018925	0.0014717
48	6.74	221	Erythronic Acid Lactone	822.727	0.0102	0.0101	0.0083	0.0103	0.0096	0.0109	0.00981682	0.00943293	0.00948136	0.00939111
225	14.62	205	Erythrose	832.236	0.0053	0.0002	0.0018	0.0028	0.003	0.0039	0.0032625	0.0033135	0.00335687	0.0032742
200	13.42	140	Ethanolamine	751.893	0.0014	0	0.0426	0.2338	0.0018	0.0022	0.00188576	0.00191432	0.00180796	0.00188228
535	30.54	338	Ferulic Acid	872.236	0.0481	0.0252	0.1328	0.1003	0.0263	0.0446	0.0364406	0.038742	0.0387024	0.0421332
13	5.54	132	Formononetin	699.944	0.0029	0.0017	0.0021	0.0018	0.0008	0.0017	0.00117599	0.00124589	0.00134201	0.00121609
464	25.44	103	Fructose	901.076	0.8374	13.583	0.2912	0.6729	0.4541	0.6531	0.423314	0.427404	0.487582	0.576241
453	25.02	243	Fructose-1-Phosphate	629.36	1.6732	0.3639	0.0103	0.0122	0.1196	0.7859	0.0182234	0.0174403	0.0203215	0.0207678
335	19.77	191	Fructose-6-Phosphate	628.971	0.0091	0.01	0.0045	0.0034	0.0063	0.0107	0.00703082	0.00716326	0.00671018	0.00672011
174	12.23	245	Fumaric Acid	962.654	0.3072	0.0063	0.1094	0.1665	0.2607	0.6275	0.296742	0.294981	0.287738	0.284634
489	26.87	204	Galactinol	944.312	28.1169	7.5704	28.9009	46.0269	1.7541	9.4407	13.1525	13.1441	13.142	13.0995
403	22.72	217	Galactitol	891.195	1.3143	0.8049	0.418	0.7185	0.4936	0.6533	0.577862	0.560932	0.59363	0.735137
514	28.19	147	Galactonic Acid	914.308	0.6395	0.198	0.4139	0.271	0.1341	0.3337	0.28083	0.295301	0.293387	0.296691
327	19.3	333	Galacturonic Acid	732.231	0.0017	0.0014	0.0006	0.0018	0.0019	0.0027	0.00127864	0.0012272	0.00170576	0.00182305
602	35.7	147	Glucoheptulose	859.319	0.026	0.024	0.5687	1.0253	0.8609	1.0242	0.920702	0.97226	0.904549	0.965601
516	28.27	147	Gluconic Acid	913.423	0.2732	0.2216	0.505	0.6261	0.2785	0.1554	0.254759	0.245206	0.250192	0.250169
474	26.06	217	Gluconic Acid Lactone	863.357	29.2686	0.383	0.0128	0.0523	0.0315	19.9363	0.0369373	0.0369412	0.0412665	0.0512713
195	13.13	131	Glucosamine	700.529	0.0029	0	0.001	0.0016	0.0043	0.0158	0.00425968	0.00424038	0.00410533	0.0043274
472	25.93	319	Glucose	957.159	97.7524	97.8883	21.8245	46.9212	48.7811	61.9533	48.7039	49.3611	55.1085	51.2019
17	5.68	155	Glucose-1,2,3,4,5,6,6 Deuterated	731.921	0.0007	0.0007	0.0008	0.0006	0.0008	0.0007	0.000618999	0.000604266	0.00066491	0.000678389
296	18.09	217	Glucose-1-Phosphate	892.761	0.0103	0.0094	0.0088	0.0089	0.007	0.0085	0.00895934	0.00902872	0.0083534	0.00862827
595	35.03	299	Glucose-6-Phosphate	895.837	0.1273	0.3532	0.0889	0.2222	0.1942	0.4077	0.1796	0.189715	0.204309	0.211529
297	18.16	174	Glutamate	730.207	0.0013	0.0015	0.0017	0.0019	0.0015	0.1242	0.0018917	0.00157775	0.00169067	0.0015775
316	18.93	246	Glutamic Acid	910.849	1.266	1.3391	1.192	1.7896	0.9686	1.3133	1.30968	1.33425	1.31949	1.30905
75	8.18	155	Glutamine	735.907	0.0021	0.0018	0.0015	0.0027	0.0027	0.0024	0.00214397	0.00229229	0.00173495	0.00143755
236	15.14	155	Glutamine Dehydrated	889.539	0.0047	0	0.0018	0.0714	0.0107	0.0019	0.0170791	0.0143239	0.0111832	0.0114313
66	7.85	218	Glutaric Acid	763.679	0.001	0.0008	0.0006	0.0008	0.0645	0.0009	0.000974768	0.000878931	0.000730152	0.000753122
418	23.39	282	Glutathione	724.995	0.0202	0.0102	0.0078	0.0586	0.0246	1.4808	0.0228645	0.020346	0.0267872	0.0314181
165	11.71	147	Glyceric Acid	932.855	0.8942	0.0153	0.4544	0.6408	1.1287	1.4985	0.856302	0.866694	0.863254	0.859129
139	10.52	205	Glycerol	900.904	0.2646	0.2643	0.1852	0.2609	0.2379	0.2659	0.244201	0.241353	0.23762	0.236473
399	22.58	299	Glycerol-Alpha-Phosphate	841.46	0.041	0.0614	0.0259	0.1661	0.0668	0.1228	0.0528847	0.0528258	0.0642623	0.0752618
153	11.19	174	Glycine	933.387	0.0567	0.0772	0.0546	0.1147	0.1934	0.1182	0.0997323	0.098135	0.0956719	0.0954184
50	6.92	147	Glycolic Acid	990.154	0.0537	0.0701	0.0317	0.0649	0.068	0.1114	0.0676471	0.0690191	0.0630301	0.0633993
203	13.56	373	Glycyl-Proline	720.338	0.0026	0.0001	0.0031	0.0046	0.0057	0.0016	0.00454842	0.00406163	0.00452303	0.00426031
572	33.33	328	Guanidinosuccinate	619.203	0.0088	0.0098	0.0076	0.0141	0.0072	0.0099	0.0099454	0.00899827	0.00918	0.00918727
723	42.4	324	Guanosine	726.466	0.053	0.04	0.0142	0.0497	0.0394	0.0607	0.0345343	0.0368374	0.0405781	0.0405158
103	9.22	85	Hexadecane	788.015	0.0019	0.0018	0.0016	0.0017	0.0017	0.0017	0.00167629	0.00170669	0.00174587	0.0016566
519	28.49	333	Hexaric Acid	916.321	6.4651	2.705	15.2609	5.809	1.6118	2.6861	3.72956	3.7559	3.74549	3.75942
563	32.64	102	Hippuric Acid	597.817	0.4242	0.3523	0.3988	0.4765	13.8597	0.3839	0.379064	0.320671	0.369813	0.314091
116	9.57	146	Homoserine	666.371	0.0343	0.0011	0.0004	0.0013	0.0017	0.0011	0.000910659	0.00104294	0.000973537	0.000909739
208	13.7	104	Hydrocinnamic Acid	736.714	0.0167	0.0021	0.0047	0.0044	0.0032	0.0119	0.00617541	0.0058112	0.00582152	0.00564157
61	7.59	250	Hydroxylamine	964.837	0.0022	0.0019	0.0033	0.0042	0.0037	0.0028	0.00346914	0.00245571	0.00251591	0.00244403
502	27.57	266	Hypoxanthine	624.678	0.0045	0.005	0.3663	0.0163	0.0045	0.0161	0.00648201	0.00665075	0.00622675	0.00630371
254	16.16	237	Inosine	717.266	0.0012	0	0.0009	0.0007	0.0005	0.0005	0.000911533	0.000906997	0.000958355	0.000895315
369	21.15	245	Inosine-5'-Monophosphate	680.677	0.0021	0.1875	0.1183	0.0013	0.0021	0.0017	0.00175591	0.00170834	0.00163091	0.00204758
620	36.64	318	Inositol-4-Monophosphate	897.375	0.0036	0.0106	0.1446	0.3349	0.4372	0.5945	0.316498	0.352649	0.325118	0.349424
701	41.14	361	Inulotriose	874.809	0.2611	0.0042	0.0301	0.0045	0.0872	0.0987	0.0767975	0.0739452	0.0845246	0.0840454
742	43.38	307	Isochlorogenic Acid	793.38	1.048	0.4546	0.0805	0.1572	0.1955	0.624	0.256241	0.290407	0.342368	0.35191
432	23.99	370	Isocitric Acid	838.799	0.0134	0.0115	0.0076	0.0112	0.0068	0.01	0.00565028	0.00639606	0.00763071	0.0112431
520	28.62	147	Isohexonic Acid	908.634	0.255	0.092	0.2711	0.295	0.0942	0.1647	0.163761	0.159237	0.165511	0.160951
147	10.92	158	Isoleucine	974.217	0.0106	0.0403	0.0139	0.0493	0.0277	0.0198	0.0267368	0.026614	0.026473	0.0268081
504	27.7	389	Isomaltose	704.449	0.0407	0.0054	0.0226	0.0139	0.0066	0.0292	0.0191876	0.0204331	0.022089	0.0209321
281	17.34	147	Isothreonic Acid	951.591	2.5035	0.7207	0.1303	0.2195	0.4322	1.1851	0.825643	0.834167	0.825661	0.821198
170	12.02	147	Itaconic Acid	904.826	0.0237	0.0004	0.0241	0.0666	0.0434	0.0528	0.0958557	0.0653356	0.0306393	0.0236693
221	14.41	89	Ketodeoxyhexonate	709.072	0.0412	0	0.0237	0.001	0.0014	0.003	0.00131446	0.00117145	0.00144604	0.00134718
678	39.98	349	Keto-Hexonic Acid	537.613	0.3889	0.0045	0.0002	0.0006	0.0231	0.0218	0.0185896	0.0177284	0.0180744	0.0183
349	20.29	217	Kynurenic Acid	663.502	0.051	0.0021	0.0021	0.0571	0.1099	0.0041	0.054894	0.00272746	0.0016457	0.00214033
133	10.24	201	Kynurenine	659.13	0.0008	0.0009	0.0001	0.0004	0.0004	0.0011	0.000719238	0.000692749	0.000623009	0.000639805
45	6.62	147	Lactic Acid	943.251	0.0524	0.0367	0.0351	0.0564	0.0369	0.0484	0.0405614	0.035226	0.0349404	0.03622
728	42.61	160	Lactitol	798.907	0.0791	0.0314	0.0151	0.0211	1.4748	0.0321	0.0282331	0.0250604	0.0290311	0.0287926
582	34.23	204	Lactobionic Acid	823.768	0.2583	0.1855	0.0894	0.1898	0.0956	0.2454	0.149839	0.152056	0.153112	0.155528
793	45.46	105	Lanosterol	704.494	79.6843	80.7174	76.2605	138.525	110.554	130.041	96.5046	112.342	88.5095	96.8001
530	29.79	267	L-Dopa	699.168	0.0074	0.0038	0.028	0.0139	0.0054	0.0103	0.00732987	0.00723702	0.00797906	0.00844807
145	10.86	158	Leucine	788.913	0.0193	0.0392	0.0162	0.0487	0.0009	0.0015	0.000767283	0.000610238	0.000696751	0.000580862
88	8.63	215	Lithocholic Acid	681.797	0.0004	0.0004	0.0004	0.0005	0.0004	0.0004	0.000387324	0.000363697	0.000372784	0.000349763
211	13.81	174	Lysine	774.385	0.0284	0.0004	0.0222	0.0294	0.0264	0.0232	0.0257537	0.0259093	0.0255433	0.0258485
667	39.45	185	Lysopalmitoyl Monogalactosylglycerol	691.35	0.0426	0.008	0.0001	0.0012	0.0076	0.0215	0.106327	0.0106877	0.0100908	0.0103519
245	15.59	147	Malate	950.432	13.2158	0.1893	5.6482	6.4651	8.1763	9.5092	8.48527	8.6453	8.62086	8.56999
152	11.17	147	Maleic Acid	926.274	0.048	0.0557	0.0534	0.1228	0.1159	0.111	0.18364	0.131005	0.0685973	0.0610244
184	12.63	117	Malic Acid	788.243	0.0111	0.0002	0.0048	0.0057	0.011	0.0139	0.00887029	0.00907948	0.00944014	0.00918129
14	5.58	235	Malonic Acid	691.496	0.0004	0.0003	0.0003	0.0003	0.0003	0.0003	0.000271741	0.000322992	0.000320894	0.000336567
609	36.06	307	Maltitol	827.169	0.0013	0.0013	0.045	0.0729	0.1127	0.0994	0.0698822	0.0715828	0.0656398	0.0693953
635	37.33	204	Maltotriose	913.552	0.037	0.0381	0.8987	2.1725	3.2666	3.1579	1.97515	2.16498	2.02219	2.14509
498	27.41	292	Mannonic Acid	875.9	0.1527	0.0559	0.1238	0.1039	0.0467	0.0783	0.0812127	0.0792097	0.0804984	0.0766632
674	39.85	361	Melezitose	908.3	1.2375	0.0163	0.0045	0.0062	0.4313	0.6614	0.448856	0.609197	0.587338	0.566729
778	44.82	297	Metanephrine	605.652	0.3438	0.1454	0.0699	0.1374	0.1273	0.246	0.173334	0.16571	0.164778	0.132363
89	8.69	241	Methanolphosphate	957.269	0.2787	0.4369	0.2481	0.5802	0.3122	0.571	0.366648	0.362832	0.370918	0.370927
10	5.46	155	Metharbital	790.87	0.0029	0.0029	0.0024	0.0027	0.0026	0.0028	0.00266831	0.00289019	0.00234485	0.00274386
255	16.27	176	Methionine	841.895	0.6043	0.0001	0.0017	0.0314	0.0066	0.1435	0.0115252	0.0115007	0.0112302	0.011266
25	5.89	89	Methyl O-D-Galactopyranoside	716.548	0.002	0.0024	0.0011	0.0018	0.0025	0.0036	0.00178368	0.00181554	0.00191962	0.00173468
3	5.27	173	Methylhexose	731.42	0.001	0.0013	0.0568	0.0015	0.0016	0.0019	0.00132385	0.00148616	0.00121476	0.00120833
199	13.4	184	Methylmaleic Acid	872.564	0.002	0	0.0019	0.0047	0.0034	0.0041	0.00545149	0.00449576	0.00259227	0.00202608
189	12.81	213	Methyltetrahydrophenanthrenone	703.349	0.0036	0.0001	0.0013	0.003	0.0028	0.006	0.00333678	0.00337389	0.00322482	0.00327508
210	13.78	97	Myristyl Myristate	702.344	0.0032	0.0001	0.0031	0.0055	0.0028	0.1861	0.00242608	0.0031341	0.00400492	0.00526064
543	31.16	290	N-Acetyl-5-Hydroxytryptamine	708.422	0.0568	0.023	0.1383	0.1559	0.0262	0.0491	0.0449863	0.0459009	0.0505927	0.0496749
542	31.12	319	N-Acetyl-D-Hexosamine	910.47	0.2542	0.1035	0.5653	0.547	0.1055	0.1639	0.190599	0.192268	0.191087	0.192161
419	23.4	172	N-Acetyl-D-Mannosamine	725.954	0.0127	0.0065	0.0067	0.0133	0.0084	0.0673	0.00656198	0.00711298	0.00470106	0.00501363
533	30.16	202	N-Acetylgalactosamine	736.125	0.0065	0.1349	0.0114	0.0081	0.1196	0.0027	0.00371857	0.00389054	0.00309566	0.00392186
256	16.31	108	N-Acetylglutamate	735.656	0.0026	0	0.0899	0.4144	0.1281	0.2425	0.00336686	0.00296382	0.00274291	0.00261638
240	15.31	203	N-Acetylmannosamine	664.338	0.0014	0	0.0011	0.0019	0.0021	0.0032	0.00244182	0.00247449	0.00222658	0.00237234
220	14.4	174	N-Acetylornithine	842.851	0.0019	0	0.0013	0.003	0.0019	0.0988	0.00182003	0.00182874	0.0016288	0.00170741
249	15.9	174	N-Acetylputrescine	904.49	0.5216	0.0079	0.4505	0.5743	0.5212	0.4883	0.508226	0.514366	0.512217	0.511473
188	12.76	160	N-Carbamoylaspartate	761.075	0.0102	0.0001	0.002	0.0038	0.0055	0.0115	0.00481978	0.00502099	0.00531255	0.00533038
273	17	186	Nicotianamine	755.311	0.0038	0.0028	0.0009	0.0028	0.0027	0.0057	0.00304342	0.00326424	0.00292193	0.00257685
151	11.11	180	Nicotinic Acid	946.621	0.018	0.0183	0.0135	0.018	0.0182	0.024	0.0127091	0.0144884	0.017641	0.0165561
227	14.81	98	N-Methylglutamic Acid	675.004	0.3325	0.0062	0.3055	0.0171	0.0096	0.0116	0.0151745	0.0151247	0.0157527	0.0067346
146	10.91	166	Nornicotine	689.938	0.0164	0.0092	0.0051	0.073	0.0017	0.0032	0.00846118	0.0079293	0.00668381	0.00631823
154	11.22	201	Octanal	717.381	0.001	0.001	0.0152	0.0009	0.0009	0.0015	0.000862327	0.00103226	0.000905711	0.000877595
92	8.84	109	Oleic Acid	697.639	0.001	0.001	0.001	0.0027	0.0009	0.0009	0.000756923	0.000925596	0.00100309	0.0013153
536	30.62	475	Ornithin	560.307	0.0048	0.0032	0.1424	0	0.0015	0.0056	0.00343914	0.00358393	0.00368218	0.00360336
314	18.78	142	Ornithine	950.344	0.0151	0.0128	0.0116	2.3663	0.0642	0.0326	0.0130839	0.0168067	0.0156378	0.0158764
53	7.17	119	O-Toluic Acid	672.165	0.0019	0.0018	0.0015	0.0022	0.0019	0.002	0.00169786	0.00174216	0.00213384	0.00225467
67	7.9	147	Oxamic Acid	919.377	0.0145	0.0259	0.0091	0.0363	0.0372	0.1434	0.0179305	0.0201985	0.0238425	0.0205707
257	16.32	156	Oxoproline	953.099	0.684	0.0126	0.5882	3.372	0.9422	2.3336	1.34178	1.30553	1.23724	1.22896
511	28.04	214	Palatinitol	729.152	0.0161	0.0066	0.0262	0.017	0.0047	0.0044	0.012695	0.0115422	0.00830615	0.00858443
527	29.55	117	Palmitic Acid	929.095	0.1442	0.0466	0.5469	0.3032	0.061	0.078	0.0834112	0.125521	0.165442	0.191038
513	28.16	247	Pantothenic Acid	718.43	0.0128	0.1255	1.2206	0.0211	0.0069	0.0113	0.00961467	0.0094861	0.00960359	0.00593109
182	12.49	215	Pelargonic Acid	823.573	0.0023	0	0.0015	0.0024	0.0023	0.0021	0.00159986	0.00171365	0.0016566	0.00146659
357	20.83	103	Pentitol	929.947	0.0788	0.0586	0.0392	0.0427	0.0522	0.0668	0.0538739	0.0548243	0.0527626	0.0532605
398	22.54	217	Pentonic Acid	755.976	1.2894	0.791	0.398	1.0064	0.6707	0.8637	0.80737	0.743231	0.646479	0.746326
680	40.16	289	Pentonolactone	699.963	7.6643	0.0723	0.0392	0.0583	5.2265	6.9815	4.49231	4.56272	4.41529	4.36804
1	5.17	91	Phenaceturic Acid	707.867	0.0035	0.0035	0.0035	0.0035	0.003	0.0033	0.00292282	0.00293606	0.00296159	0.002849
55	7.28	151	Phenol	766.111	0.0178	0.0198	0.0147	0.0197	0.0183	0.0159	0.01826	0.0185295	0.0188468	0.0179801
317	18.98	192	Phenylalanine	883.47	0.0109	0.0055	0.0064	0.0357	0.0185	0.0171	0.0158421	0.0158111	0.0155174	0.0153752
622	36.8	299	Phosphohexonic Acid	726.17	0.0021	0.0008	0.0067	0.0177	0.0228	0.0458	0.0167828	0.0221432	0.01934	0.0223145
162	11.67	196	Phytol	814.8	0.0009	0.0012	0.0011	0.052	0.0732	0.024	0.00674208	0.00672419	0.00743259	0.00687958
604	35.76	128	Phytosphingosine	749.992	0.0125	0.0143	0.0087	0.022	0.0153	0.0495	0.0131984	0.0187943	0.0143934	0.0181623
420	23.43	281	Piceatannol	634.232	0.0175	0.0091	0.1634	0.2551	0.0063	0.0098	0.0059236	0.00538185	0.00608184	0.00705177
259	16.38	305	Pipecolic Acid	707.931	0.002	0	0.0007	0.0011	0.0014	0.0013	0.00139338	0.00109599	0.000975486	0.00123345
150	11.03	142	Proline	961.257	0.0149	0.0411	0.0187	0.066	0.0341	0.049	0.0772904	0.0612164	0.0516965	0.0498799
393	22.34	133	P-Tolyl Glucuronide	653.031	0.8813	0.0135	0.0211	0.056	0.0132	0.0201	0.00853875	0.0125427	0.0107965	0.0421673
383	21.79	174	Putrescine	922.892	0.2215	0.1728	0.1231	1.7208	0.2192	0.5354	0.314057	0.320249	0.357809	0.430499
15	5.63	175	Pyrogallol	696.679	0.0012	0.0012	0.0009	0.0012	0.0013	0.0013	0.00141995	0.000911698	0.00115449	0.00100418
173	12.18	240	Pyrrole-2-Carboxylic Acid	757.521	0.0009	0	0.0008	0.0027	0.0023	0.0018	0.00176585	0.00160934	0.00130473	0.00123444
39	6.47	174	Pyruvic Acid	971.021	0.1428	0.1367	0.0353	0.0493	0.0698	0.1575	0.0920646	0.092319	0.0923413	0.0921912
450	24.93	345	Quinic Acid	936.919	43.8664	10.1483	0.936	1.5821	3.323	21.0814	10.0892	10.1336	11.3994	13.7647
26	5.93	251	Resveratrol	645.821	0.0003	0.0003	0.0002	0.0125	0.0003	0.0004	0.000272964	0.000267691	0.000292659	0.000305454
409	22.99	292	Ribonic Acid	789.166	0.2715	0.0642	0.041	0.0474	0.0795	0.0625	0.0683027	0.0690216	0.0782651	0.093374
352	20.37	103	Ribose	961.694	0.1093	0.1475	0.0775	0.1238	0.1214	0.1584	0.116265	0.115392	0.116195	0.114669
49	6.86	225	Ribose-5-Phosphate	672.445	0.0028	0.0036	0.0027	0.0029	0.0029	0.0029	0.00273126	0.00268231	0.00281622	0.00300173
382	21.76	147	Ribulose-5-Phosphate	767.818	0.1445	0.0633	0.0777	0.0864	0.0798	0.0999	0.0648858	0.0676096	0.073798	0.0879929
525	29.29	333	Saccharic Acid	907.521	1.6484	0.7411	4.27	1.2497	0.3339	0.5192	0.925239	0.922111	0.931153	0.92772
177	12.31	89	Salicylaldehyde	725.585	0.0026	0	0.0022	0.002	0.0017	0.0038	0.00198919	0.00216376	0.00214096	0.0021013
180	12.39	204	Serine	945.817	0.0205	0.0008	0.0982	0.2279	0.2616	0.145	0.101983	0.107333	0.108293	0.105589
465	25.56	104	Sophorose	861.104	5.0803	5.8872	1.2265	160.287	2.2724	3.3105	2.61337	2.62317	2.9263	3.54017
287	17.7	147	Sorbitol	850.261	0.4952	0.0046	0.0046	0.0071	0.005	0.009	0.00510873	0.00471425	0.0046914	0.00492159
577	33.74	117	Stearic Acid	861.219	0.0929	0.0543	0.0538	0.088	0.0442	0.0651	0.0486021	0.084885	0.118264	0.149941
158	11.41	147	Succinic Acid	956.815	0.8994	0.4893	0.4004	0.5062	0.2032	0.6082	0.511376	0.502326	0.489425	0.488143
683	40.33	102	Sucrose	667.44	0.2298	0.0034	0.0039	0.0052	0.3029	0.2526	0.239642	0.207135	0.230122	0.174319
90	8.72	221	Sulfuric Acid	665.549	0.0095	0.0071	0.008	0.0094	0.0087	0.0096	0.00669401	0.00691138	0.00673665	0.00669595
466	25.56	103	Tagatose	905.557	2873.2	55.2944	12.35	26.1573	1323.34	31.8731	24.6504	24.9216	27.9333	34.0588
328	19.34	292	Tartaric Acid	828.159	0.0027	0.0019	0.0011	0.0019	0.0042	0.0024	0.0021388	0.00258495	0.00227037	0.00224487
140	10.65	85	Tetracosane	904.995	0.0093	0.0091	0.0089	0.0085	0.009	0.0091	0.00915733	0.00908208	0.00904273	0.00892198
191	12.97	218	Threonine	946.379	0.0134	0.0006	0.0162	0.0408	0.033	0.0301	0.0257119	0.0261614	0.0269892	0.0253911
101	9.05	147	Thymidine	763.373	0.0028	0.0029	0.0036	0.0055	0.005	0.0049	0.00405841	0.00412106	0.0036687	0.00400046
230	14.91	255	Thymine	861.031	0.0475	0.0007	0.0442	0.0843	0.0695	0.0838	0.0611708	0.0663297	0.0542614	0.048108
372	21.29	430	Tocopherol Acetate	680.979	0.0012	0.0017	0.0008	0.0012	0.001	0.0014	0.000977695	0.000942724	0.000910251	0.000862053
454	25.06	243	Tranexamic Acid	773.582	0.0764	0.5326	0.0606	0.0122	0.1284	0.5507	0.0180658	0.0169797	0.0220144	0.0207678
333	19.6	158	Trans-4-Hydroxy-L-Proline	678.479	0.0018	0.0014	0.0015	0.0033	0.0021	0.003	0.00221223	0.00210825	0.00184534	0.00197147
568	33.03	342	Trehalose-6-Phosphate	708.152	0.0083	0.0093	0.0036	0.0108	0.0085	0.0128	0.00776267	0.00740469	0.00705964	0.00699453
755	43.85	147	Trisaccharide	818.238	0.2153	0.1364	0.1301	0.2126	0.2013	0.2669	0.187228	0.161778	0.168217	0.168557
250	15.96	280	Tyrosine	820.152	0.0009	0	0.0009	0.0011	0.001	0.0013	0.0011618	0.00110155	0.000939373	0.000882134
324	19.21	174	Udp-N-Acetylglucosamine	793.638	0.0025	0.0025	0.002	0.003	0.0025	0.0033	0.00239543	0.00239814	0.00235906	0.00250146
168	11.91	241	Uracil	912.073	0.0041	0.0001	0.0049	0.0077	0.0069	0.0077	0.00604591	0.00609586	0.00583487	0.00590356
131	10.11	147	Urea	957.727	0.0087	1.0585	0.0084	0.2816	0.6165	0.0119	0.300711	0.301512	0.296145	0.291462
378	21.58	305	Uric Acid	681.115	0.0033	0.0047	0.0807	0.002	0.0025	0.0027	0.00232057	0.00272993	0.00272026	0.00312069
410	23.01	217	Uridine	831.446	0.41	0.3932	0.0644	0.1489	0.1763	0.066	0.185855	0.198351	0.222068	0.286874
562	32.62	100	Uridine-5'-Monophosphate	635.001	0.0332	1.623	0.0237	0.0351	2.3566	0.0505	0.0433104	0.0315664	0.0376244	0.0322432
109	9.38	144	Valine	976.884	0.0271	0.0764	0.0317	0.0792	0.0488	0.0661	0.0471769	0.0490209	0.0486295	0.0499637
553	31.82	179	Xanthine	624.243	0.0432	0.0195	0.0041	0.0071	0.0093	0.0121	0.012789	0.0122183	0.0138988	0.0138133
163	11.68	213	Xylonic Acid	732.837	0.0006	0.0008	0.0137	0.0004	0.0005	0.0011	0.000636499	0.000708986	0.000662466	0.000641887
350	20.29	346	Xylonolactone	741.835	0.0212	0.0229	0.0001	0.0004	0.0297	0.0013	0.000589875	0.000525917	0.000554542	0.000530431
332	19.55	103	Xylose	813.967	0.0132	0.0174	0.002	0.0037	0.0059	0.008	0.00777101	0.00774316	0.00749731	0.00744162
239	15.28	103	Xylulose	849.216	0.0432	0.0006	0.0067	0.0141	0.0193	0.0378	0.0237174	0.0245112	0.0233142	0.0229208
