# Supplementary material
Source: MDPI journal article supplement (https://www.mdpi.com/1999-4907/12/5/595)

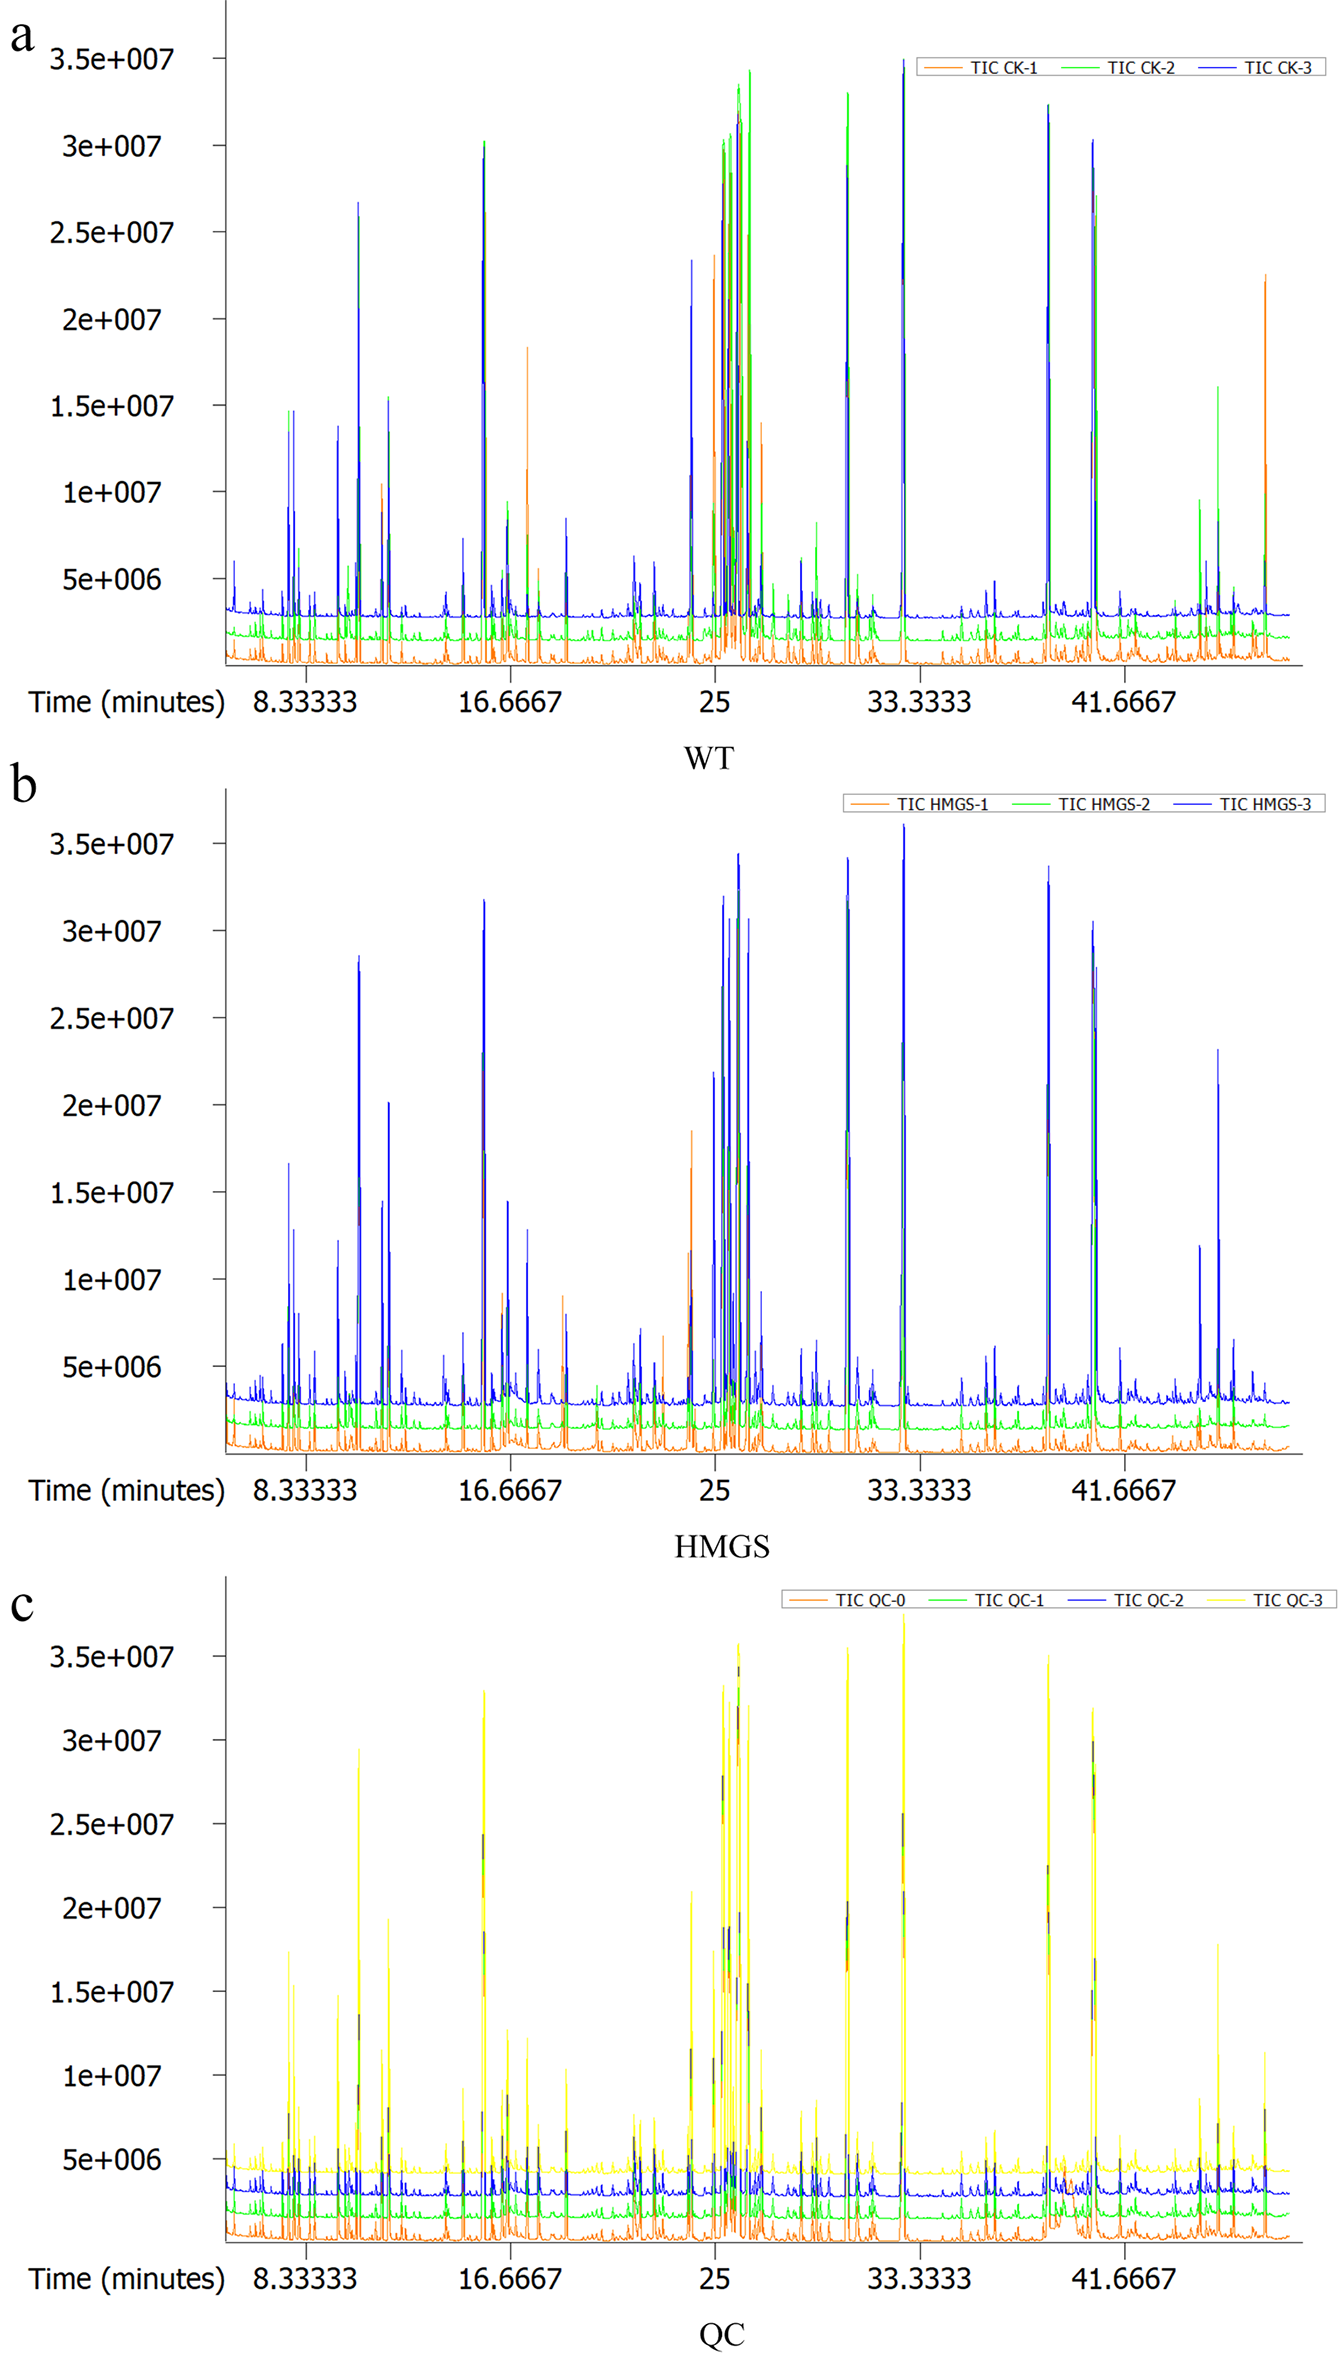

Supplement: s1 [file s1 › FigureS1.tif]

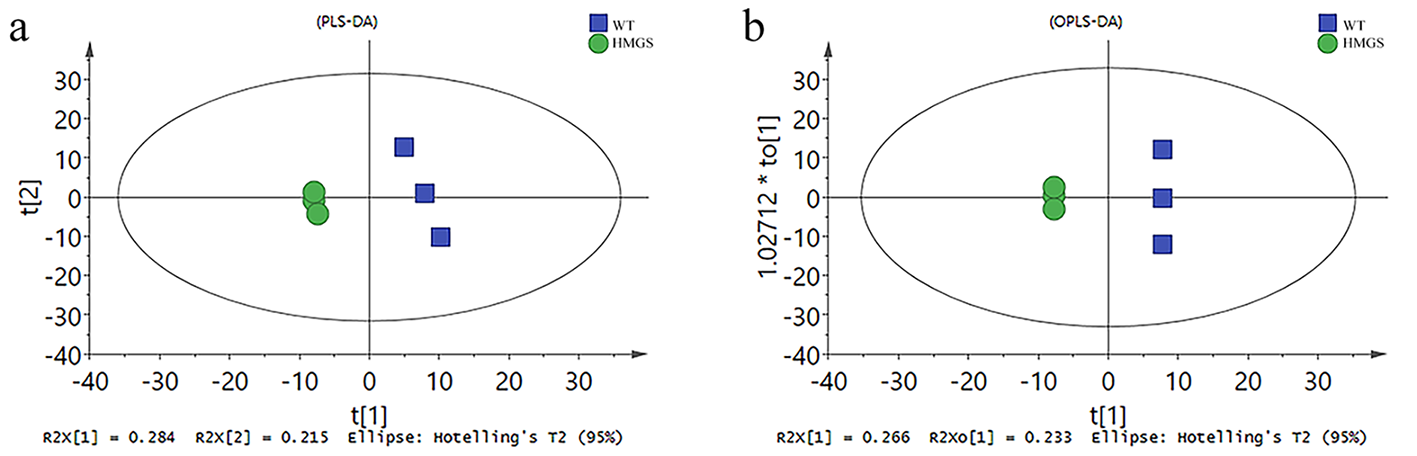

Supplement: s1 [file s1 › FigureS2.tif]
